# Supplementary material for: Community composition of zooplankton exported from a shallow polymictic reservoir linked to wind conditions
Source: PeerJ. 2019 Sep 2;7:e7611. doi: 10.7717/peerj.7611 (PMC6727831; doi:10.7717/peerj.7611)
Supplement: Supplemental Information 2 — Data are arranged by data and sample order. The first sample was at noon and samples are bi-hourly after that. Zooplankton abundances are scaled to individuals per liter. Units for other variables can be found in the text. [file peerj-07-7611-s002.xlsx]

## Sheet: Outfall
Naup	Cop	Bos	Chy	Clad	Rot	Midge	Ostra	DO	pH	Turb	Wtemp	Atemp	WindMax	Month	SampleOrder	Location
39.758	0.924606	0.924606	0	0	175.675	0	0.924606	7.55	7.56	5.1	23.1	24.4	1.19	August	1	O
48.0795	3.69842	1.84921	0	0	120.199	0	1.84921	7.44	7.61	4.25	23.9	28	0.07	August	2	O
90.6114	0.924606	0	0	0	122.048	0	1.84921	7.62	7.66	4.74	23.8	29	0	August	3	O
65.647	1.84921	0	0	0	101.707	0	2.77382	7.49	7.64	7.41	24.4	31.5	0.59	August	4	O
60.0994	0.924606	0	0	0	479.87	0	0	7.36	7.87	2.75	24.2	25.2	0.01	August	5	O
84.1391	5.54763	0	0.924606	0	1447.01	0	1.84921	7.4	7.76	3.47	23.8	22.8	0	August	6	O
43.4565	10.1707	0	0	0	319.914	0	0	7.16	7.51	3.51	23.1	20.4	0	August	7	O
36.0596	4.62303	0	0	0	170.127	0	6.47224	7.36	7.53	3.95	22.9	18.6	0	August	8	O
44.3811	1.84921	0	0	0	149.786	0	1.84921	7.34	7.13	4.42	22.6	18	0	August	9	O
40.6827	0.924606	0	0	0	380.013	0	1.84921	7.35	7.1	5.24	22.2	17.1	0	August	10	O
39.758	0.924606	0	0.924606	0	247.794	0	0.924606	7.37	7	5.13	22.1	18.6	0	August	11	O
24.9644	0.924606	0	0	0	154.409	0	2.77382	7.49	6.9	4.02	23.1	24.8	1.02	August	12	O
27.7382	0	0	0	0	123.897	0	0.924606	7.4	6.87	3.38	23.7	31.6	0.61	August	13	O
61.024	1.84921	191.393	6.47224	4.62303	2166.35	0.924606	2.77382	6.8	7.79	5.87	26.6	28.5	0.71	July	1	O
27.7382	0	140.54	0	1.84921	396.656	0	1.84921	7.1	7.87	6.79	26.8	27.3	0.31	July	2	O
31.4366	1.84921	134.068	0	4.62303	286.628	0	17.5675	7.3	8.08	6.34	27.5	35.4	0.81	July	3	O
24.9644	1.84921	82.2899	0	0.924606	178.449	0	0.924606	7.39	8.09	6.3	27.3	34.6	0.03	July	4	O
29.5874	0.924606	90.6114	0	4.62303	338.406	0	4.62303	7.43	8.14	6.19	27.2	29.3	0.02	July	5	O
33.2858	42.5319	74.8931	0	26.8136	118.35	0	12.9445	7.22	8.11	5.78	27.1	27.7	0	July	6	O
25.889	24.0398	75.8177	0	13.8691	206.187	0.924606	3.69842	7.36	8.14	5.28	26.9	26.2	0	July	7	O
38.8334	38.8334	101.244	3.69842	6.93454	131.294	0	7.39685	7.22	7.97	5.94	26.7	25.2	0	July	8	O
54.5517	50.8533	85.0637	0	12.9445	166.429	1.84921	13.8691	6.96	7.79	6.76	26.6	24.3	0.06	July	9	O
49.0041	23.1151	92.4606	0	7.39685	209.886	0	5.54763	6.84	7.52	5.91	26.4	24.1	0	July	10	O
37.9088	5.54763	24.9644	1.84921	3.69842	226.528	0	0	6.71	7.65	5.47	26.3	29.2	0	July	11	O
34.2104	6.47224	30.512	0	0	183.997	0	4.62303	6.8	7.7	7.02	26.6	27	0.36	July	12	O
32.3612	3.69842	34.2104	5.54763	1.84921	135.917	0.924606	5.54763	7.4	7.89	5.41	27.2	29.9	0.78	July	13	O
5.54763	0.924606	0	0.462303	0	83.2145	0	1.38691	8.15	7.36	2.51	26.5	33	0.03	June	1	O
1.84921	0	0	0	0	91.536	0	13.8691	8.5	7.38	2.16	27.8	31.1	0	June	2	O
1.84921	0.184921	0.369842	0.554763	0.369842	33.8406	0.369842	1.47937	8.45	7.48	5.95	28.4	38	0.02	June	3	O
4.43811	1.10953	0	0	0	66.9415	0.739685	1.10953	6.2	7.77	3.74	27.8	36.2	0	June	4	O
5.08533	0	0	0	0	92.9229	0.924606	1.84921	7.4	7.37	2.24	26.9	31.1	0	June	5	O
8.78376	6.47224	1.38691	0.462303	0	213.122	1.84921	10.633	8.6	7.76	2.85	26.8	28.3	0	June	6	O
6.47224	8.32145	1.84921	0	3.69842	136.842	0.924606	12.9445	8.2	7.33	3.16	25.9	27.3	0	June	7	O
1.84921	4.16073	2.31151	0.462303	0	135.455	0	4.16073	8.03	7.38	3.23	26.1	26.5	0.01	June	8	O
5.17779	2.5889	0	1.84921	0.369842	173.086	0.739685	2.95874	8.27	7.44	3.51	25.9	23.9	0	June	9	O
3.23612	0	0	0	0	373.078	1.38691	1.38691	8.04	7.44	3.16	25.7	23	0	June	10	O
5.54763	0.924606	0	1.84921	0	394.807	0.924606	0.924606	8.03	7.41	3.67	25.6	25.1	0.01	June	11	O
9.24606	0	0.924606	0	0	415.148	0	1.84921	7.65	7.35	4.28	27.1	26.3	0	June	12	O
2.68136	0	0	0	0	76.6498	0	1.29445	8.05	7.44	3.29	28.7	35.3	0	June	13	O

## Sheet: Weather Station
SampleID	Month	Year	ConMeanPrecip	ConMeanSolarRad	ConMeanTemp	ConTotalSolarRad	ConWindMaxVariability	ConWindAvgVariability	ConMaxWind	ConMeanWind	30MeanPrecip	30MeanSolarRad	30MeanTemp	30TotalSolarRad	30WindMaxVariability	30WindAvgVariability	30MaxWind	30MeanWind	60MeanPrecip	60MeanSolarRad	60MeanTemp	60TotalSolarRad	60WindMaxVariability	60WindAvgVariability	60MaxWind	60MeanWind	120MeanPrecip	120MeanSolarRad	120MeanTemp	120TotalSolarRad	120WindMaxVariability	120WindAvgVariability	120MaxWind	120MeanWind
1	June	2017	0	922.571	90.2857	1937.65	3	3	14	5.85714	0	886.167	89.3333	1595.17	4	3	12	4	0	862.917	89	3106.5	6	4	12	3.58333	0	808.583	88.1667	5822.23	7	4	12	3.70833
2	June	2017	0	793.429	91.8571	1665.9	2	3	14	9	0	823.167	91.6667	1481.81	2	3	16	8.5	0	897.5	91.25	3230.97	5	4	18	8.91667	0	917.583	90.9167	6607.08	5	4	18	7.875
3	June	2017	0	581.429	92.2857	1221	2	2	19	10.8571	0	746.167	92.8333	1342.94	3	3	17	10	0	782.167	92.6667	2815.72	3	3	17	9.75	0	748.042	92.0417	5385.21	3	3	17	9.16667
4	June	2017	0	267.167	87.6667	480.666	1	1	14	8.83333	0	412.429	89.7143	865.91	3	3	15	9.85714	0	458.692	90.6923	1788.9	4	3	20	10.5385	0	521	91.4	3907.51	4	4	20	10.48
5	June	2017	0	20	81.8571	42.165	1	1	3	0.714286	0	91.6667	84.8333	165.125	2	3	3	0.5	0	122	85.4167	439.289	2	3	6	1.33333	0	176.435	86.3478	1217.24	2	3	14	4.08696
6	June	2017	0	0	77	0.113	2	1	9	4.42857	0	0	77	0.124	1	2	3	0.833333	0	0	77.5833	0.476	2	3	3	0.666667	0	6.25	79.2917	45.649	2	3	3	0.541667
7	June	2017	0	0	76.5714	0.055	2	2	10	5.71429	0	0	76.1667	0.038	1	1	8	4.83333	0	0	76.25	0.086	1	1	8	4.75	0	0	76.5	0.242	2	1	9	4.41667
8	June	2017	0	0	76.4286	0.102	2	2	8	3.42857	0	0	76.8333	0.081	2	1	11	6	0	0	76.8333	0.151	2	1	11	6.08333	0	0	76.7917	0.252	2	2	11	6
9	June	2017	0	0	72.5714	0.008	3	1	0	0	0	0	73	0.01	3	2	1	0	0	0	73.5	0.042	3	4	5	0.916667	0	0	74.75	0.212	4	4	8	2
10	June	2017	0	60.7143	72.4286	127.713	2	3	3	0	0	9.33333	72	16.741	2	2	2	0	0	4.83333	72	17.705	2	3	2	0	0	2.41667	72.2083	17.726	3	4	2	0
11	June	2017	0	319.286	79.5714	670.197	2	2	8	4.42857	0	280	77.5	504.513	2	2	6	2	0	192.417	76.4167	693.101	3	3	6	1.08333	0	133.667	74.875	962.976	4	5	6	0.541667
12	June	2017	0	691.571	86.1429	1452.92	4	4	9	3.42857	0	594.333	83.3333	1069.68	2	2	7	1.66667	0	482.167	82.8333	1735.56	3	2	7	2.08333	0	437.333	81.6667	3148.55	3	3	9	3.125
13	June	2017	0	830	91.7143	1743.03	4	4	14	5.14286	0	873	90.5	1571.57	3	2	12	5.5	0	852.083	89.75	3067.65	4	3	12	4.5	0	774.542	88.2083	5577.59	4	4	12	4.08333
1	July	2017	0	328.286	80.7143	689.28	3	2	14	7.71429	0	384	80.3333	691.183	2	2	14	7.16667	0	446.417	79.9167	1607.18	3	2	14	6.33333	0	460.5	79.0833	3316.21	3	2	14	5.25
2	July	2017	0	877.429	83	1842.3	2	3	13	5.57143	0	712	80.3333	1281.43	3	2	9	3.33333	0	519.583	79.5	1870.32	3	2	12	4.75	0	390.875	79.75	2813.92	4	3	14	6.25
3	July	2017	0	426	85.1429	894.432	3	1	12	5.71429	0	528.833	85	951.98	4	1	14	6.66667	0	655.667	84.9167	2360.01	4	2	14	5.91667	0	757.167	84.1667	5451.45	4	3	14	5.83333
4	July	2017	0	304.833	85	548.781	3	2	12	6	0	402.429	85.2857	845.17	3	2	13	6.28571	0	444.462	85.4615	1733.39	3	2	13	6.61538	0	451.48	85.4	3385.57	4	2	13	6.24
5	July	2017	0	15	80.2857	31.35	3	2	9	3	0	68	81.6667	122.42	2	1	7	2.83333	0	95.4167	82.25	343.661	3	1	14	4.5	0	175.391	83.3913	1210.44	3	2	14	5.34783
6	July	2017	0	0	77	0	2	1	11	4.85714	0	0	77	0	3	1	8	2.33333	0	0	77.5	0.028	3	1	8	2.83333	0	4.5	78.5833	32.431	4	2	9	2.625
7	July	2017	0	0	76	0	2	1	9	3.57143	0	0	76.5	0	2	1	9	3.5	0	0	76.75	0	3	1	11	4.16667	0	0	76.875	0.001	3	1	11	4.54167
8	July	2017	0	0	76.2857	0	2	1	12	7.14286	0	0	76	0	2	2	12	5	0	0	76	0	2	2	12	4.25	0	0	76	0	3	2	12	3.83333
9	July	2017	0	0	76	0.002	2	1	11	6.71429	0	0	76	0	3	2	13	7.5	0	0	76.0833	0	3	2	13	7	0	0	76.25	0	3	2	13	7.25
10	July	2017	0	34.7143	74.7143	72.832	1	1	8	4.57143	0	2.5	74.5	4.406	3	2	6	2.16667	0	1.25	74.9167	4.567	3	3	10	3.25	0	0.625	75.4583	4.569	3	3	11	4.91667
11	July	2017	0	319.714	79.8571	671.28	3	2	10	5.14286	0	212.833	77.8333	382.905	2	2	9	4	0	153.833	77.25	553.501	2	2	9	4	0	105.25	76.25	757.181	2	2	9	4.29167
12	July	2017	0	580.143	84.7143	1218.2	2	2	12	6.57143	0	465.5	83	838.38	3	2	8	3.33333	0	428.083	82.5	1542	3	2	10	4.33333	0	394.167	81.4583	2838.47	4	2	10	4.70833
13	July	2017	0	869	88.2857	1824.84	2	2	16	9.14286	0	795	87.6667	1431.22	2	2	15	9.16667	0	719.417	87.1667	2589.79	2	2	15	8.33333	0	670.042	86.25	4824.25	3	3	15	7.625
1	August	2017	0	516	72.5714	1082.96	4	2	10	4	0	335.5	71	603.988	3	2	11	3.33333	0	372.583	71	1341.31	3	2	11	3.83333	0	329.708	70.1667	2374.11	4	3	14	4.25
2	August	2017	0	480.571	75.1429	1009.17	3	2	11	4.85714	0	469.333	74.3333	844.92	2	3	11	4.33333	0	546.25	74.25	1966.77	4	3	12	4.33333	0	569.667	73.625	4101.64	5	3	12	4.29167
3	August	2017	0	489.143	77.4286	1027.43	4	2	12	4.42857	0	596	77	1072.75	3	2	12	4.83333	0	664.083	76.9167	2390.4	3	3	14	5.25	0	594.042	76.2083	4276.73	5	4	14	4.875
4	August	2017	0	278.5	78	501.128	2	1	10	4.5	0	402.429	78.2857	845.28	2	2	13	7.42857	0	432.308	78.0769	1685.93	2	2	13	6.92308	0	434.48	77.72	3258.59	4	3	13	6.12
5	August	2017	0	3.71429	69.4286	7.722	6	1	0	0	0	47.8333	74.5	85.889	2	2	3	0	0	85.3333	75.9167	307.423	3	3	6	0.916667	0	159.696	76.8261	1101.72	3	3	10	2.52174
6	August	2017	0	0	63.5714	0	2	1	0	0	0	0	64.1667	0	1	1	0	0	0	0	64.5833	0.001	2	1	0	0	0	1.08333	66.3333	7.804	7	2	0	0
7	August	2017	0	0	62.5714	0	2	1	0	0	0	0	62.5	0	2	1	0	0	0	0	62.75	0	2	1	0	0	0	0	63.0417	0	2	1	0	0
8	August	2017	0	0	61	0	1	1	0	0	0	0	61.6667	0	1	1	0	0	0	0	61.8333	0	2	1	0	0	0	0	62.0833	0	2	1	0	0
9	August	2017	0	0	60	0	2	1	0	0	0	0	60	0.017	3	1	0	0	0	0	60.1667	0.017	4	1	0	0	0	0	60.5	0.017	4	1	0	0
10	August	2017	0	14.5714	59	30.609	3	2	0	0	0	0.166667	59.6667	0.46	3	1	0	0	0	0.0833333	59.6667	0.461	5	1	0	0	0	0.0416667	59.8333	0.461	7	1	0	0
11	August	2017	0	379.286	67.4286	796.9	3	2	5	2	0	289.833	66.3333	521.797	3	3	3	0.166667	0	244.333	64.25	879.475	6	5	3	0.0833333	0	147.125	61.7917	1059.56	7	5	3	0.0416667
12	August	2017	0	680.857	77.7143	1430.09	3	3	7	1.85714	0	600.167	76	1079.91	2	2	7	2.83333	0	565.917	74.9167	2037.04	2	2	9	3.83333	0	489.833	72	3527.21	3	2	9	3.33333
13	August	2017	0	924.714	81.8571	1942.05	5	5	6	0.714286	0	855.167	81.3333	1539.69	3	3	8	2.33333	0	826.917	80.75	2977.76	4	4	8	2.08333	0	767.833	79.5417	5529.66	5	5	8	1.95833
